# Supplementary figures and images for: Chromatin dynamics during cellular differentiation in the female reproductive lineage of flowering plants
Source: PubMed Central journal article supplement — Plant J. 2015 May 29;83(1):160–76. doi: 10.1111/tpj.12890 (PMC4502977; doi:10.1111/tpj.12890), 2015-05-29

2-nucleate embryo sac

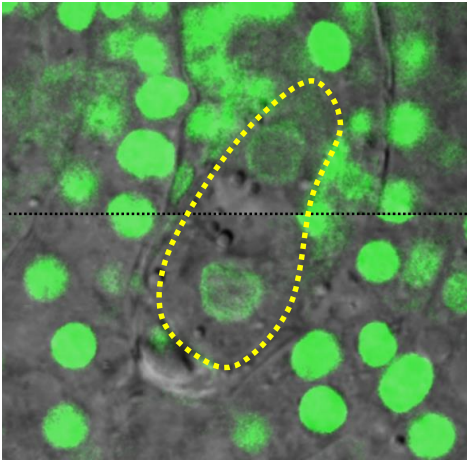

4-nucleate embryo sac

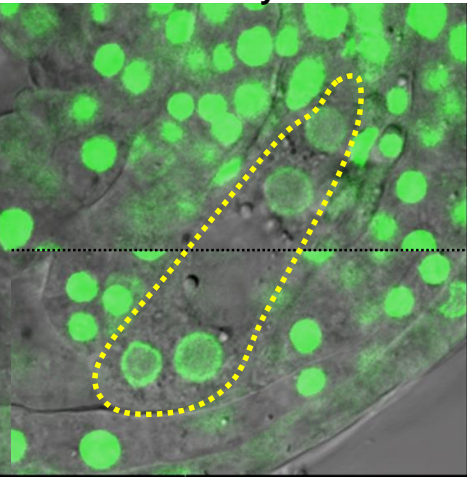

8-nucleate embryo sac

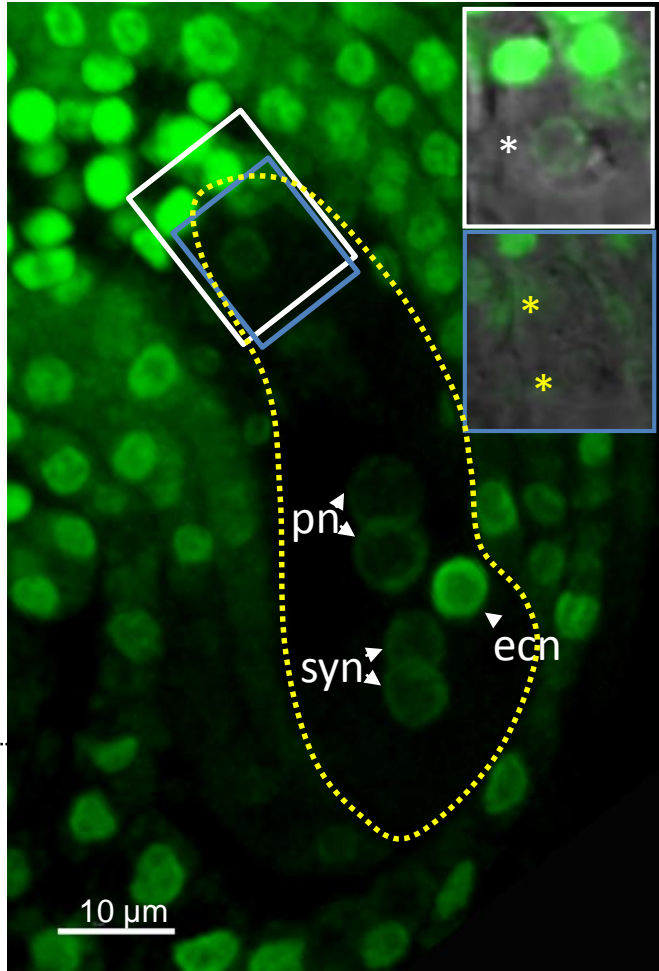

Supplement: tpj0083-0160-sd1.pdf [file tpj0083-0160-sd1.pdf]
